# Supplementary material for: Soluble porphyrin donors for small molecule bulk heterojunction solar cells
Source: Royal Society of Chemistry journal article supplement (doi:10.1039/c2jm33956k), 2012-01-01
Supplement: c2jm33956k.pdf [file c2jm33956k.pdf]

*Electric Supplementary Information*

## **Soluble Porphyrin Donors for Small Molecule Bulk Heterojunction Solar Cells**

*Junichi Hatano, Naoki Obata, Shigeru Yamaguchi, Takeshi Yasuda, and Yutaka Matsuo\**

*Department of Chemistry, School of Science, The University of Tokyo, 7-3-1 Hongo, Bunkyo-ku, Tokyo  
113-0033, Japan*

*Mitsubishi Chemical Group Science and Technology Research Center, Yokohama 227-8502, Japan.  
National Institute for Materials Science, Sengen, Tsukuba 305-0047, Japan*

### **–Table of Contents–**

- 1. NMR Spectra**
- 2. X-ray Crystallographic Studies**
- 3. Thermogravimetric-Differential Thermal Analysis**
- 4. Cyclic Voltammetry (CV)**
- 5. Hole-only and Electron-only Device Fabrication and Data**
- 6. OFET Device Fabrication and Data**
- 7. Atomic Force Microscopy (AFM)**
- 8. Reference**

## 1. NMR Spectra

\* = solvents and impurities

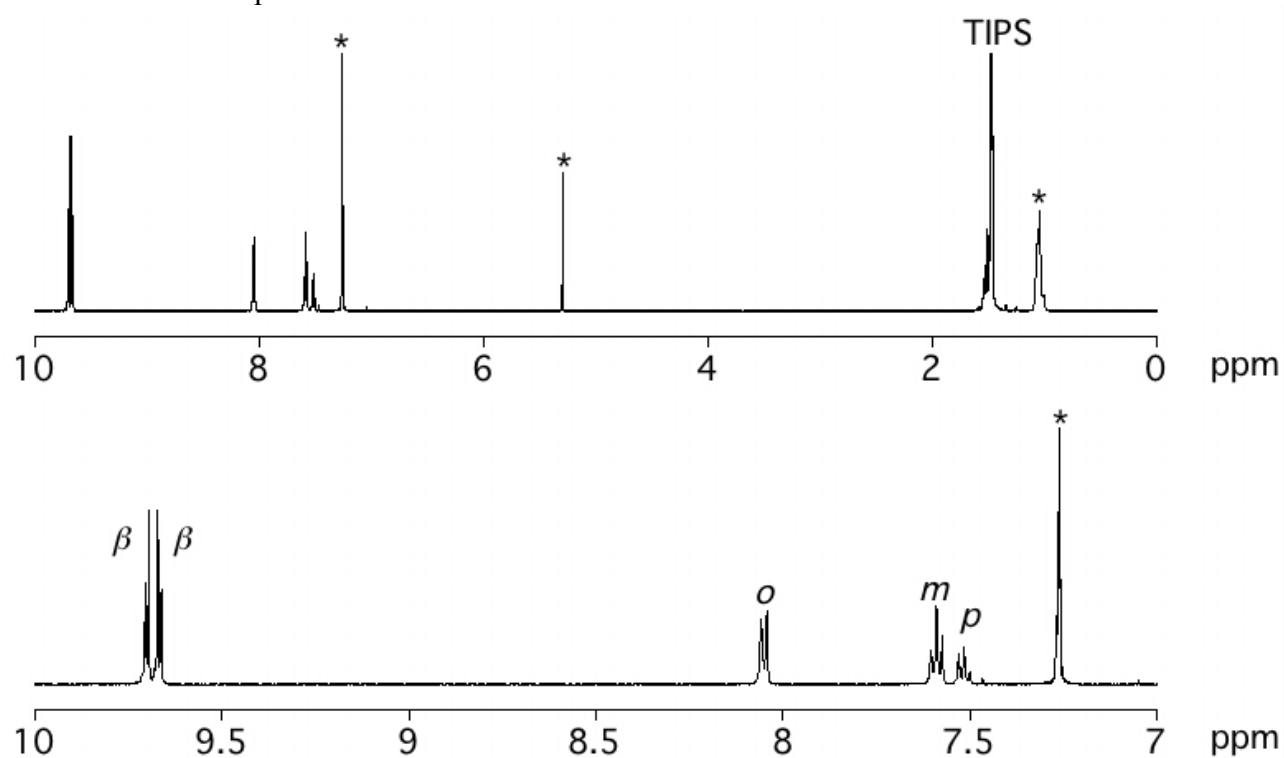

Figure S1. <sup>1</sup>H NMR spectrum of **2** in CDCl<sub>3</sub>.

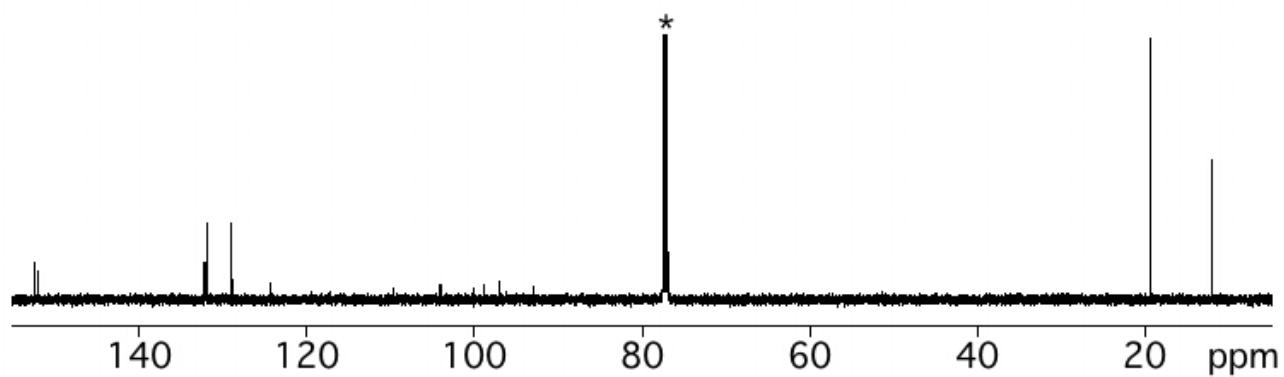

Figure S2. <sup>13</sup>C NMR spectrum of **2** in CDCl<sub>3</sub>.

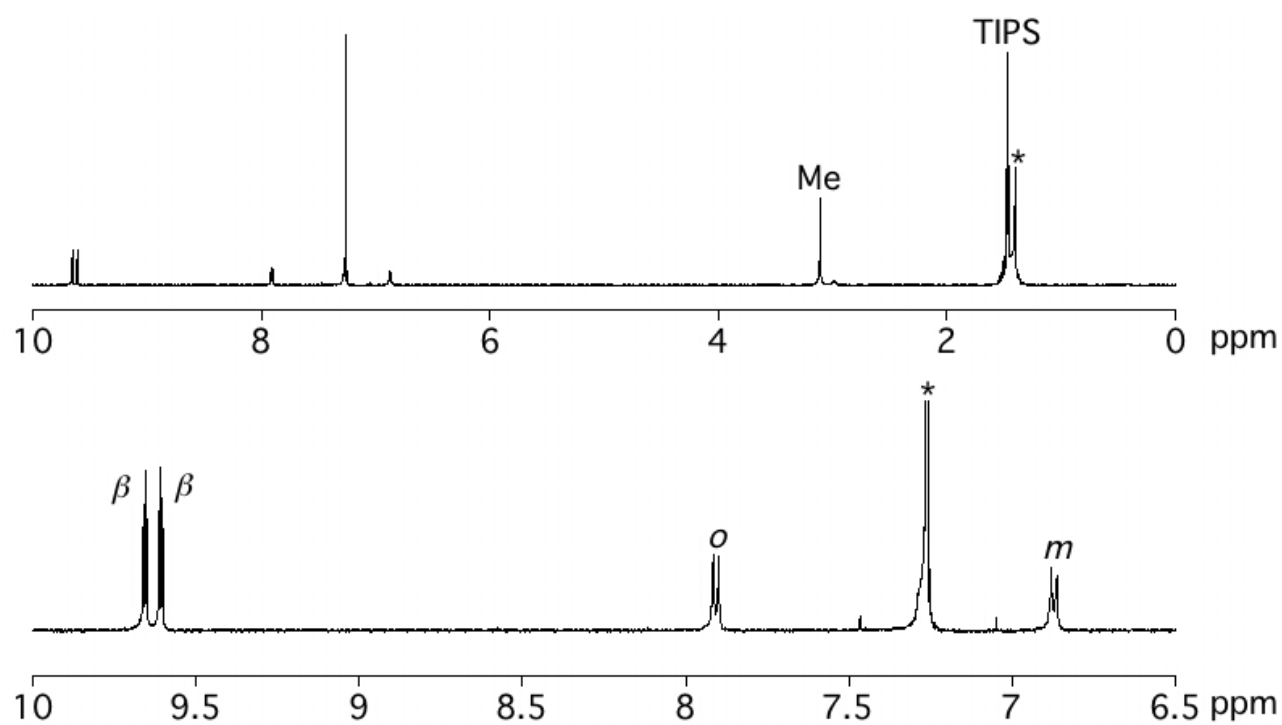

**Figure S3.** <sup>1</sup>H NMR spectrum of **3** in CDCl<sub>3</sub>.

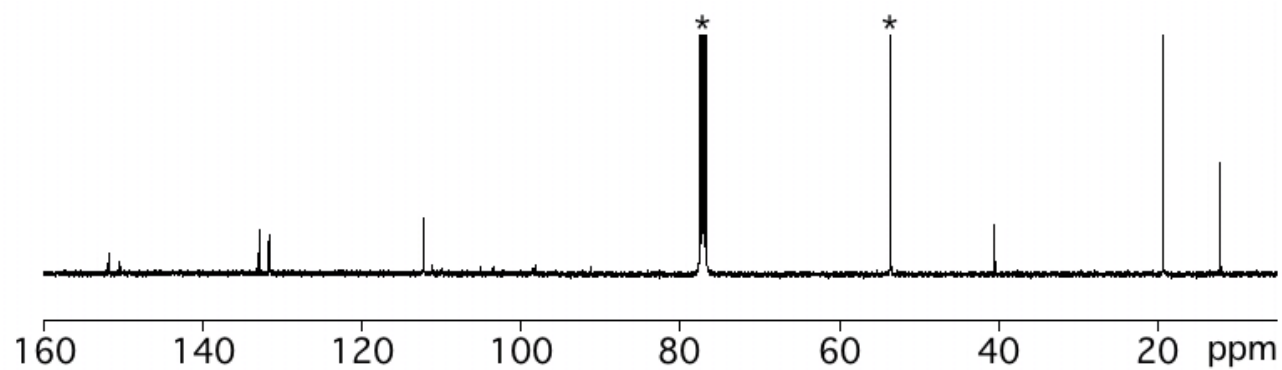

**Figure S4.** <sup>13</sup>C NMR spectrum of **3** in CDCl<sub>3</sub>.

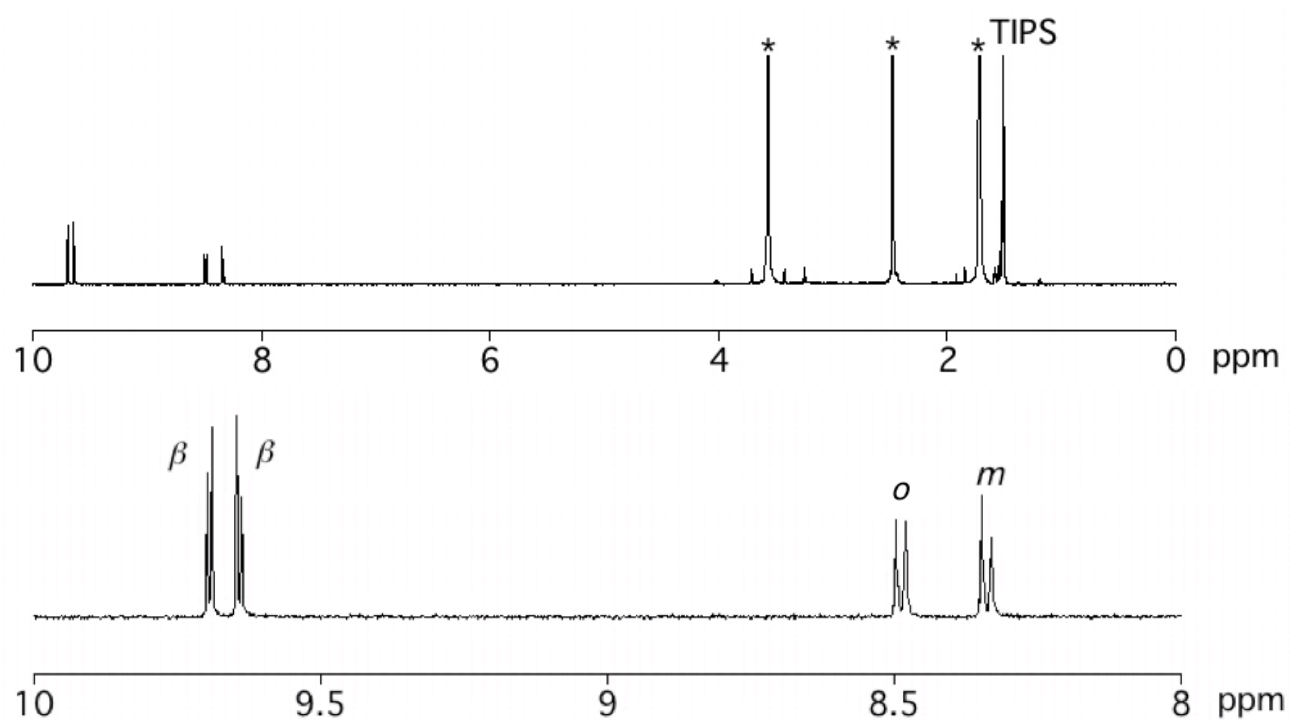

**Figure S5.** <sup>1</sup>H NMR spectrum of **4** in THF-*d*<sub>8</sub>.

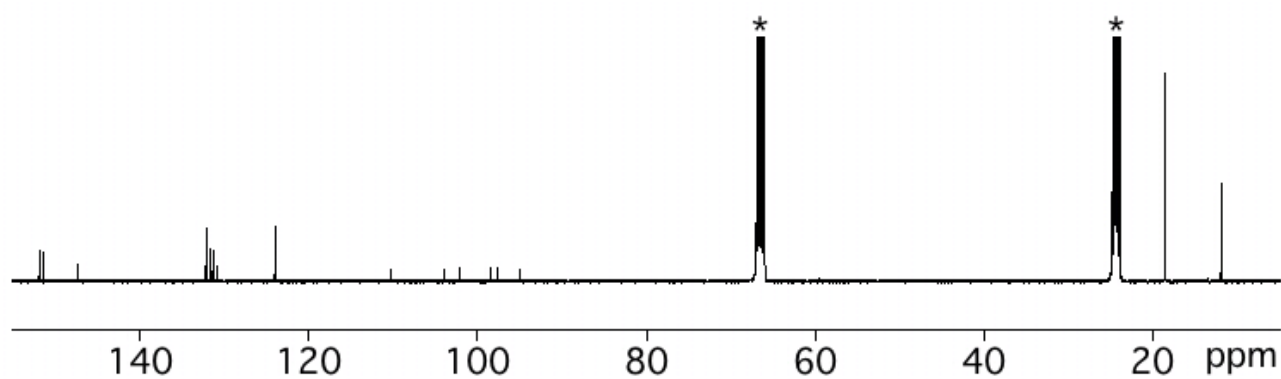

**Figure S6.** <sup>13</sup>C NMR spectrum of **4** in THF-*d*<sub>8</sub>.

## 2. X-ray Crystallographic Studies

Single crystals of **2** suitable for X-ray analysis were obtained by slow diffusion of methanol into a solution of **2** in  $\text{CHCl}_3$ .

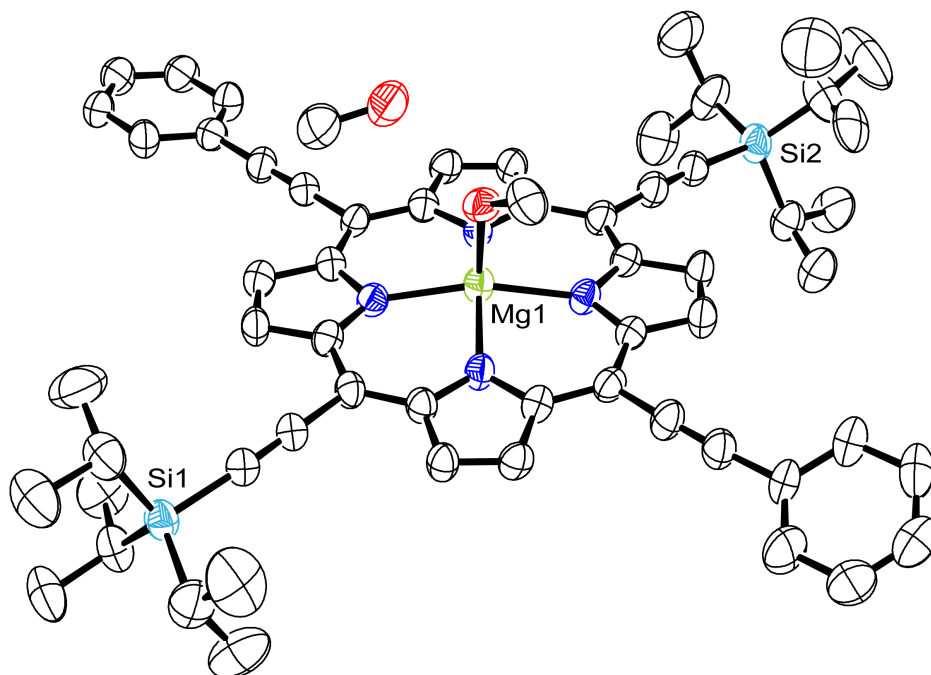

**Figure S7.** X-ray crystal structure of compound **2** coordinated by methanol.  $\text{C}_{60}\text{H}_{68}\text{MgN}_4\text{O}_2\text{Si}_2$ ,  $M_w = 957.67$ , triclinic,  $P-1$  (#2),  $a = 10.7018(2)$ ,  $b = 16.4164(3)$ ,  $c = 16.4397(3)$  Å,  $\alpha = 102.6540(10)^\circ$ ,  $\beta = 98.9910(10)^\circ$ ,  $\gamma = 95.3040(10)^\circ$ ,  $V = 2759.28(9)$  Å<sup>3</sup>,  $Z = 2$ ,  $T = 123$  K,  $R_1 = 0.1206$  [ $I > 2\sigma(I)$ ]  $wR_2 = 0.3153$  [All data], GOF [ $I > 2\sigma(I)$ ] = 1.202.

Single crystals of **4** suitable for X-ray analysis were obtained by slow diffusion of methanol into a solution of **4** in THF.

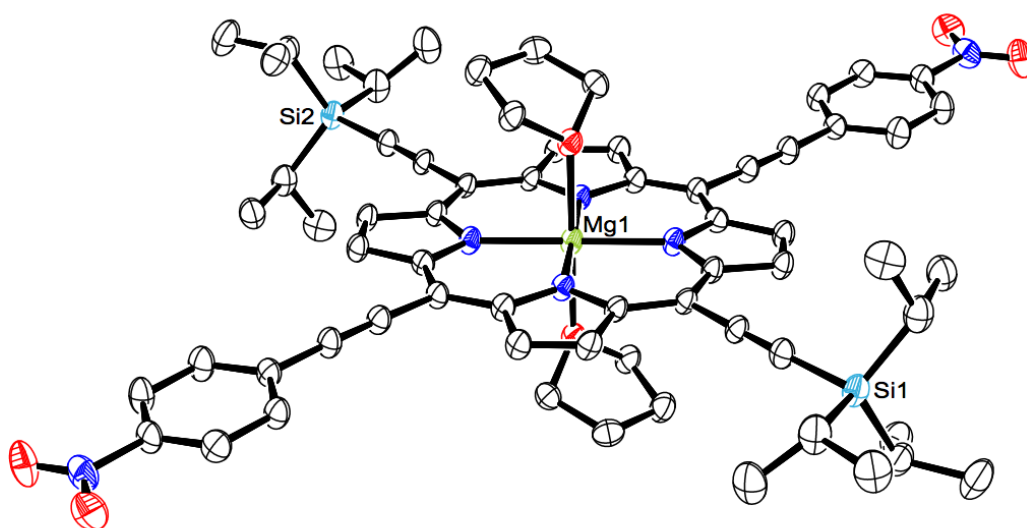

**Figure S8.** X-ray crystal structure of compound **4** coordinated by THF.  $\text{C}_{66}\text{H}_{74}\text{MgN}_6\text{O}_6\text{Si}_2$ ,  $M_w = 1127.80$ , monoclinic,  $P2_1/n$  (#14),  $a = 15.3573(3)$ ,  $b = 7.48620(10)$ ,  $c = 27.0680(5)$  Å,  $\beta = 103.4350(10)^\circ$ ,  $V = 3026.79(9)$  Å<sup>3</sup>,  $Z = 2$ ,  $T = 123$  K,  $R_1 = 0.0775$  [ $I > 2\sigma(I)$ ]  $wR_2 = 0.2465$  [All data], GOF [ $I > 2\sigma(I)$ ] = 1.033.

### 3. Thermogravimetric-Differential Thermal Analysis (TG-DTA)

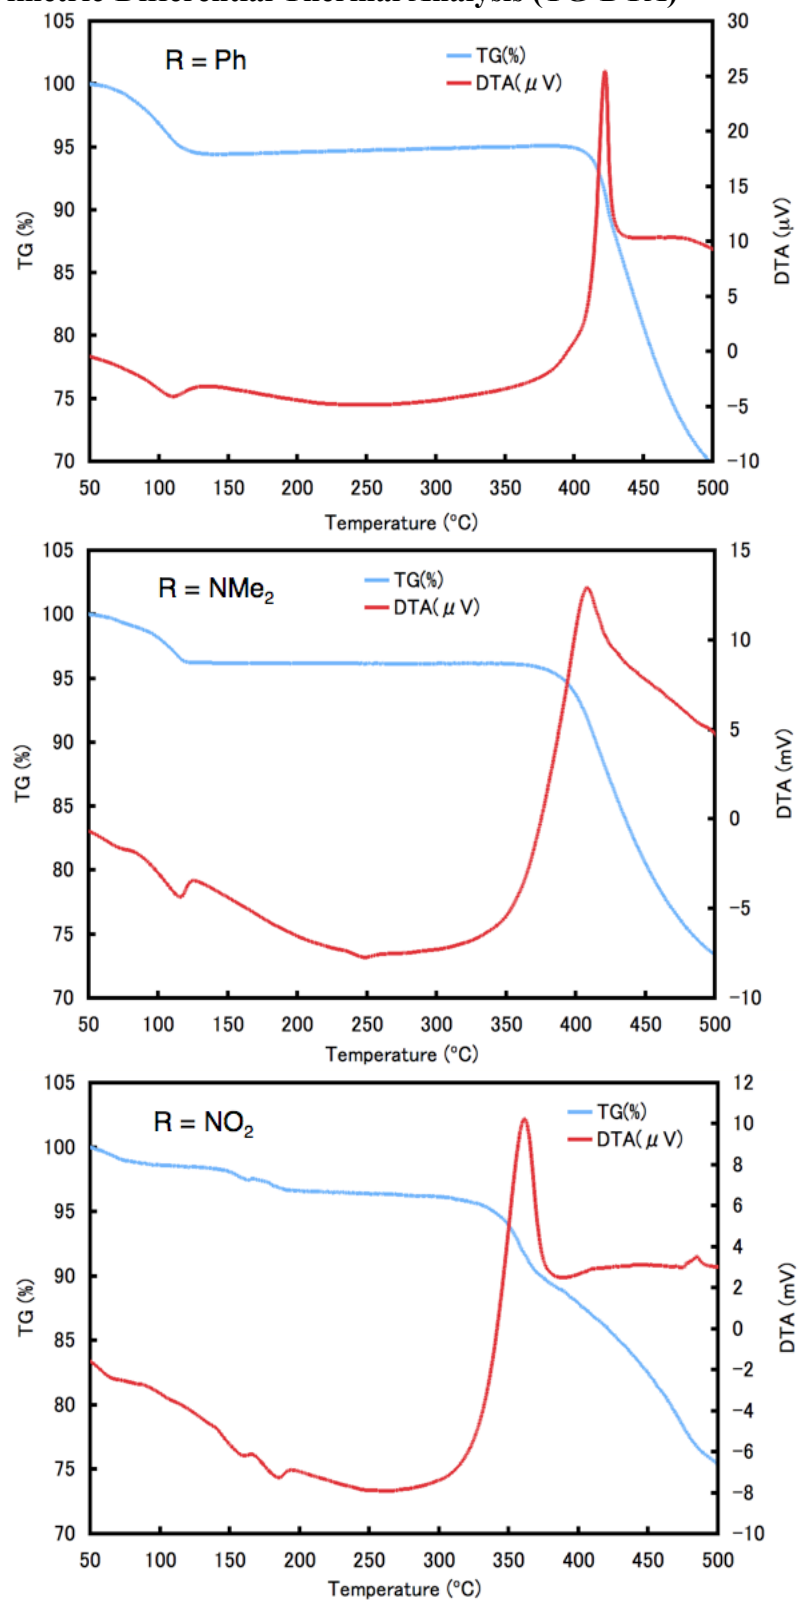

**Figure S9.** TG-DTA curves of compounds **2**, **3** and **4**. About 5% mass reduction of compounds **2** and **3** around 100 °C are attributed the removal of methanol that coordinated to the magnesium in reprecipitation.

#### 4. Cyclic Voltammetry (CV)

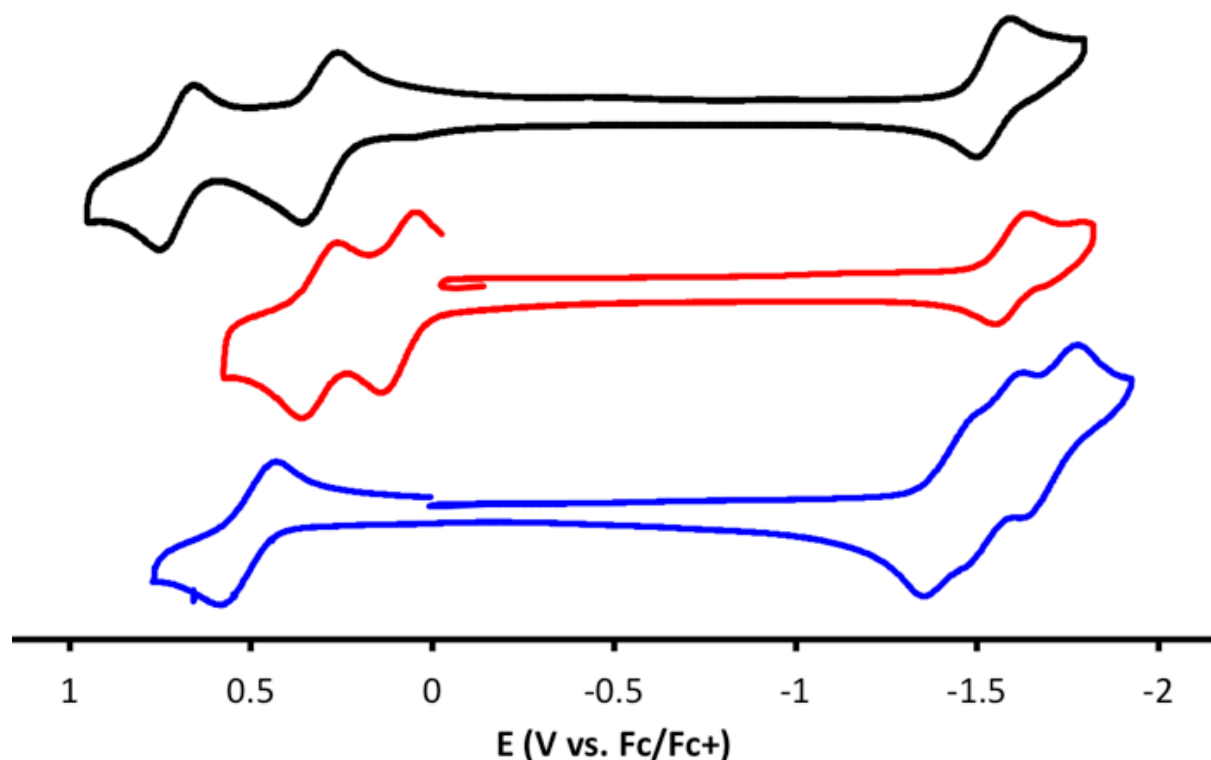

**Figure S10.** Cyclic voltammograms of compounds **2** (black), **3** (red) and **4** (blue). Measurements were performed in  $CH_2Cl_2$  (THF for compound **4**) solution containing  $TBAPF_6$  (0.1 M) as a supporting electrolyte at 25 °C with a scan rate of 100 mV/s. Glassy-carbon, platinum wire, and  $Ag/AgClO_4$  electrodes were used as working, counter, and reference electrodes, respectively. The potential was corrected against  $Fc/Fc^+$ . The HOMO and LUMO levels were estimated by the following equation;  $HOMO = -(4.8 + E_{1/2}(ox))$ ,  $LUMO = -(4.8 + E_{1/2}(red))$ .

## 5. Hole-only and Electron-only Device Fabrication and Data

The hole mobilities of the porphyrin film was evaluated by the SCLC model using hole-only devices.<sup>1</sup> The hole mobilities and the electron mobilities of the blend films composed of porphyrins and PC<sub>60</sub>BM in a mixture of 1:4 weight ratio were also evaluated by the SCLC model using hole-only and electron-only devices, respectively. For fabrication of hole-only device using each porphyrin as p-type semiconducting material, a 145-nm-thick, patterned indium-tin oxide (ITO) glass with a sheet resistance of 8  $\Omega$ /square was used as the substrate. A conducting poly(3,4-ethylenedioxythiophene)-poly(styrenesulfonate) (PEDOT:PSS, Clevios AI4083) layer was formed on the glass/ITO substrate to obtain a 30-nm-thick thin film. For fabricating blend film, compound **2** or **3**:PC<sub>60</sub>BM in a 1:4 mixture was dissolved in chlorobenzene to obtain each solution (total concentration, 3.0 wt%). Compound **4**:PC<sub>60</sub>BM in a 1:4 mixture was dissolved in THF/toluene (1/1 wt ratio) to obtain a solution (total concentration, 1.5 wt%). For fabricating porphyrin film, compounds **2** and **3** were dissolved in chloroform, and compound **4** was dissolved in THF to obtain each porphyrin solution (1.0 wt%). Each blend film, porphyrin film was formed by spin-coating method at 4500 rpm, 30 s for compound **2** or **3**, or 3000 rpm, 30 s for compound **4** on the ITO/PEDOT:PSS substrate. MoO<sub>3</sub> (10 nm) was deposited in vacuum ( $3 \times 10^{-4}$  Pa) on top of the porphyrin layer to reduce energy barrier for hole injection, followed by deposition of an aluminum electrode (Al, 110 nm) in vacuum. For fabrication of electron-only device using each compound as n-type semiconducting material, a 110-nm-thick, patterned aluminum vacuum-deposited ( $3 \times 10^{-4}$  Pa) on the glass was used as the substrate. Compound **2** or **3**:PC<sub>60</sub>BM in a 1:4 mixture was dissolved in chlorobenzene to obtain each solution (total concentration, 3.0 wt%). Compound **4**:PC<sub>60</sub>BM in a 1:4 mixture was dissolved in THF/toluene (1/1 wt ratio) to obtain a solution (total concentration, 1.5 wt%). Each blend film was formed by spin-coating method at 4500 rpm, 30 s for compound **2** or **3**, or 3000 rpm, 30 s for compound **4** on the ITO/Al substrate. We consider that the difference of the blend film thickness between ITO/PEDOT:PSS substrate and ITO/Al substrate is attributed to wettability of each solution on each substrate surface. LiF (0.6 nm) was deposited in vacuum ( $3 \times 10^{-4}$  Pa) on top of blend film to reduce the energy barrier for electron injection, followed by the deposition of an aluminum electrode (Al, 110 nm) in vacuum. All devices were encapsulated in a glove box in nitrogen atmosphere. The current of the fabricated hole-only and electron-only devices was measured with a sweeping voltage using a Keithley 2400 source measurement unit controlled by a computer. A film thickness is obtained by using a Dektak 6M stylus profiler.

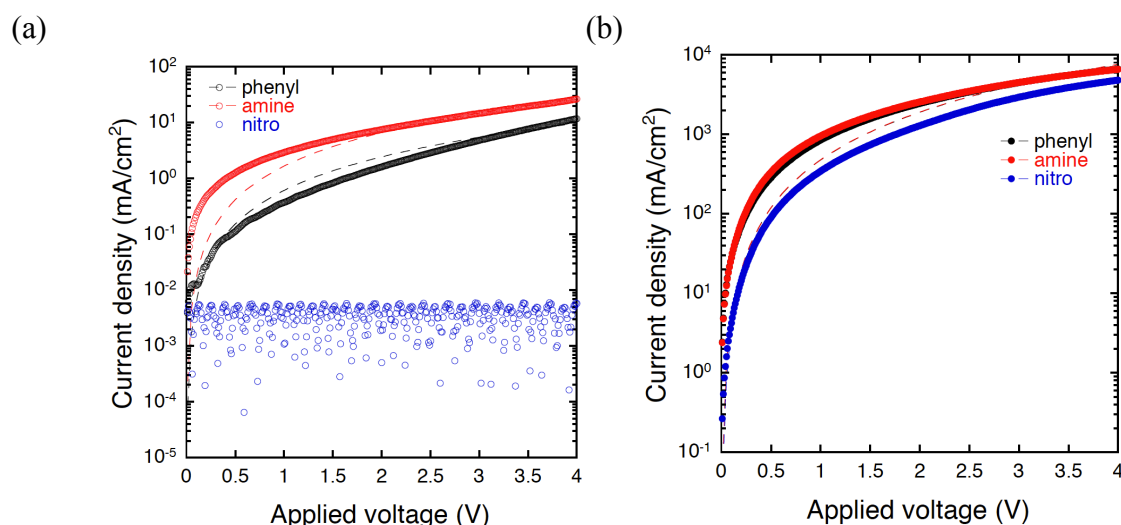

**Figure S11.** *J-V* curves of the devices. (a) hole mobility and (b) electron mobility of blend films were evaluated by space-charge current limited (SCLC) model. Dash lines show  $J \sim V^2$ .



**Table S1.** Summary of hole mobilities ( $\mu_h$ ) and electron mobilities ( $\mu_e$ ) of the blend films using porphyrins and PC<sub>60</sub>BM in a mixture of 1:4 weight ratio.

| Blend films<br>Compound:PC <sub>60</sub> BM<br>(1:4) | Hole-only device                 |                   | Electron-only device             |                   |
|------------------------------------------------------|----------------------------------|-------------------|----------------------------------|-------------------|
|                                                      | $\mu_h$<br>[cm <sup>2</sup> /Vs] | Thickness<br>[nm] | $\mu_e$<br>(cm <sup>2</sup> /Vs) | Thickness<br>[nm] |
| <b>2</b> (R = H)                                     | $2.3 \times 10^{-5}$             | 175.5             | $9.1 \times 10^{-4}$             | 76.7              |
| <b>3</b> (R = NMe <sub>2</sub> )                     | $3.7 \times 10^{-5}$             | 174.5             | $5.9 \times 10^{-4}$             | 66.5              |
| <b>4</b> (R = NO <sub>2</sub> )                      | no data                          | 139.5             | $1.2 \times 10^{-3}$             | 96.6              |

Hole-only device configuration: glass/ITO/PEDOT:PSS/blend film/MoO<sub>3</sub>/Al, electron-only device configuration: glass/Al/blend film/LiF/Al .

**Table S2.** Summary of hole mobilities ( $\mu_h$ ) of compounds **2**, **3** and **4** evaluated by SCLC model.

| Compound                         | Solvent | Thickness<br>[nm] | Hole mobility<br>[cm <sup>2</sup> /Vs] |
|----------------------------------|---------|-------------------|----------------------------------------|
| <b>2</b> (R = H)                 | CF      | 144.4             | $4.6 \times 10^{-5}$                   |
| <b>3</b> (R = NMe <sub>2</sub> ) | CF      | 141.6             | $8.0 \times 10^{-4}$                   |
| <b>4</b> (R = NO <sub>2</sub> )  | THF     | 139.8             | $5.7 \times 10^{-4}$                   |

Hole-only device configuration: glass/ITO/PEDOT:PSS/porphyrin film/MoO<sub>3</sub>/Al

## 6. OFET Device Fabrication and Data

In order to estimate the field-effect hole mobility of porphyrin derivatives, we fabricated and characterized OFETs that have a top-contact geometry. A substrate of glass/Au gate electrode / Parylene-C insulator was prepared using methods given in previous papers.<sup>2</sup> Organic semiconductors were spin-coated onto the Parylene-C layer. The substrate was transferred to an N<sub>2</sub> glovebox and then dried at 80°C for 10 min on a hot plate. Source and drain electrodes of Au (40 nm) were thermally evaporated through shadow masks. The channel length and width were fixed at 75 μm and 5 mm, respectively. OFET measurement was conducted under air using a Keithley 2636A source measurement unit.

**Table S3.** Summary of top-contact OFET performances of compounds **2**, **3** and **4**. (CB = chlorobenzene, CF = chloroform)

| Compound                         | Solvent           | Thickness [nm] | Field-effect hole mobility [cm <sup>2</sup> /Vs] | Threshold voltage [V] | On/off ratio      |
|----------------------------------|-------------------|----------------|--------------------------------------------------|-----------------------|-------------------|
| <b>2</b> (R = H)                 | CB                | 40             | $1.0 \times 10^{-6}$                             | -6.0                  | $3.2 \times 10$   |
| <b>3</b> (R = NMe <sub>2</sub> ) | CF:CB = 1:1       | 30             | $3.0 \times 10^{-3}$                             | -4.5                  | $7.5 \times 10^2$ |
| <b>4</b> (R = NO <sub>2</sub> )  | THF:Toluene = 1:1 | 26             | $3.2 \times 10^{-4}$                             | -36.1                 | $6.2 \times 10^3$ |

Device structure: Glass/gate-Au/Parylene-C/Porphyrin/Source-drain electrodes

**2** (R = H): 0.6 wt% in CB. Spin-coating conditions: 600 rpm, 60 s.

**3** (R = NMe<sub>2</sub>): 0.5 wt% in CF/CB (1/1 wt ratio). Spin-coating conditions: 600 rpm, 60 s.

**4** (R = NO<sub>2</sub>): 0.5 wt% THF/Toluene (1/1 wt ratio). Spin-coating conditions 600 rpm, 60 s.

## 7. Atomic Force Microscopy

Morphology of the active layer composed of each porphyrin and PC<sub>60</sub>BM was investigated by atomic force microscopy (AFM) in a tapping mode.

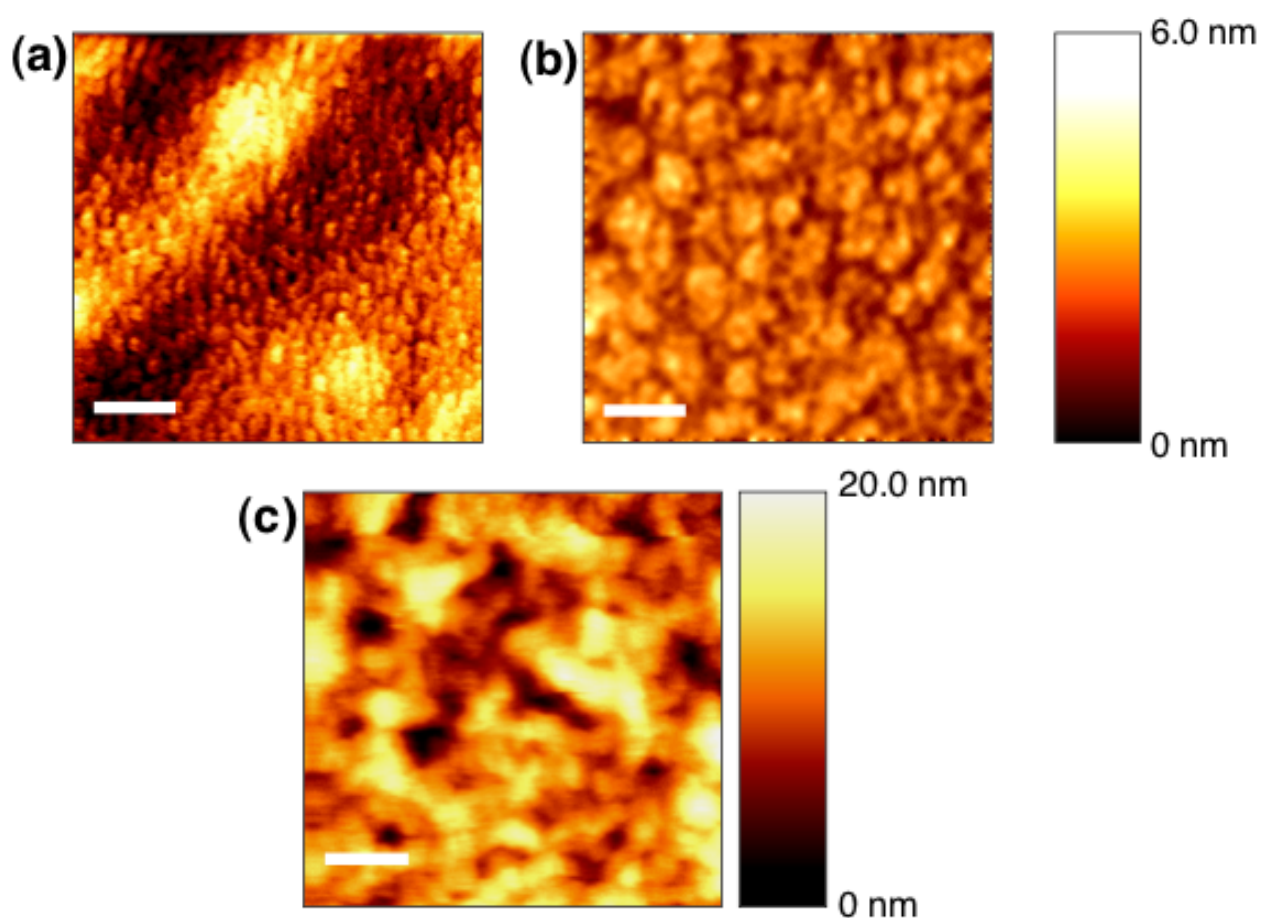

**Figure S12.** Surface topographies of the active layers composed of each porphyrin and PC<sub>60</sub>BM in a 1:4 weight ratio coated on glass/ITO/PEDOT:PSS observed by AFM. (a) Compound **2** (surface roughness,  $R_a = 0.74$  nm), (b) compound **3** ( $R_a = 0.57$  nm), and (c) compound **4** ( $R_a = 2.5$  nm). Scale bars indicate 500 nm.

## 8. Reference

- [1] a) M. A. Lampert and P. Mark, *Current Injection in Solids*, 1970; b) P. W. M. Blom, M. J. M. de Jong, J. J. M. Vlegaar, *Appl. Phys. Lett.* **1996**, 68, 3308.
- [2] T. Yasuda, K. Fujita, H. Nakashima, T. Tsutsui, *Jpn. J. Appl. Phys.* **2001**, 42, 6614.
